# Supplementary material
Source: publisher figshare collection journal article supplement (https://acs.figshare.com/ndownloader/files/7614913)
Supplement: Supplementary file 1 [file 7614913]

data_150313_yqj_br
_audit_creation_date              2015-03-13
_audit_creation_method
;
Olex2 1.2
(compiled 2014.03.20 svn.r2914 for OlexSys, GUI svn.r4816)
;
_publ_contact_author_address      ?
_publ_contact_author_email        ?
_publ_contact_author_name         ''
_publ_contact_author_phone        ?
_publ_section_references
;
Dolomanov, O.V., Bourhis, L.J., Gildea, R.J, Howard, J.A.K. & Puschmann, H.
 (2009), J. Appl. Cryst. 42, 339-341.

Sheldrick, G.M. (2008). Acta Cryst. A64, 112-122.
;
_chemical_name_common             ?
_chemical_name_systematic
;
 ? 
;
_chemical_formula_moiety          'C19 H20 Br N O'
_chemical_formula_sum             'C19 H20 Br N O'
_chemical_formula_weight          358.27
_chemical_absolute_configuration  ad
_chemical_melting_point           ?
_chemical_oxdiff_formula          'c10 h10 n2 o8 br1'
loop_
  _atom_type_symbol
  _atom_type_description
  _atom_type_scat_dispersion_real
  _atom_type_scat_dispersion_imag
  _atom_type_scat_source
 'C' 'C' 0.0033 0.0016 'International Tables Vol C Tables 4.2.6.8 and 6.1.1.4'
 'H' 'H' 0.0000 0.0000 'International Tables Vol C Tables 4.2.6.8 and 6.1.1.4'
 'Br' 'Br' -0.2901 2.4595
 'International Tables Vol C Tables 4.2.6.8 and 6.1.1.4'
 'N' 'N' 0.0061 0.0033 'International Tables Vol C Tables 4.2.6.8 and 6.1.1.4'
 'O' 'O' 0.0106 0.0060 'International Tables Vol C Tables 4.2.6.8 and 6.1.1.4'

_space_group_crystal_system       'orthorhombic'
_space_group_IT_number            19
_space_group_name_H-M_alt         'P 21 21 21'
_space_group_name_Hall            'P 2ac 2ab'
loop_
  _space_group_symop_id
  _space_group_symop_operation_xyz
 1 'x, y, z'
 2 '-x+1/2, -y, z+1/2'
 3 'x+1/2, -y+1/2, -z'
 4 '-x, y+1/2, -z+1/2'

_cell_length_a                    6.0241(5)
_cell_length_b                    10.6352(8)
_cell_length_c                    26.263(2)
_cell_angle_alpha                 90.00
_cell_angle_beta                  90.00
_cell_angle_gamma                 90.00
_cell_volume                      1682.6(2)
_cell_formula_units_Z             4
_cell_measurement_reflns_used     2304
_cell_measurement_temperature     293(2)
_cell_measurement_theta_max       29.5475
_cell_measurement_theta_min       3.0077
_exptl_absorpt_coefficient_mu     2.445
_exptl_absorpt_correction_T_max   1.00000
_exptl_absorpt_correction_T_min   0.63070
_exptl_absorpt_correction_type    multi-scan
_exptl_absorpt_process_details
;
CrysAlisPro, Agilent Technologies,
Version 1.171.35.11 (release 16-05-2011 CrysAlis171 .NET)
(compiled May 16 2011,17:55:39)
Empirical absorption correction using spherical harmonics,
 implemented in SCALE3 ABSPACK scaling algorithm.
;
_exptl_crystal_colour             colourless
_exptl_crystal_colour_primary     colourless
_exptl_crystal_density_diffrn     1.414
_exptl_crystal_density_meas       ?
_exptl_crystal_density_method     'not measured'
_exptl_crystal_description        block
_exptl_crystal_F_000              736
_exptl_crystal_size_max           0.45
_exptl_crystal_size_mid           0.38
_exptl_crystal_size_min           0.3
_exptl_special_details
;
 ? 
;
_diffrn_reflns_av_R_equivalents   0.0409
_diffrn_reflns_av_unetI/netI      0.0422
_diffrn_reflns_limit_h_max        6
_diffrn_reflns_limit_h_min        -7
_diffrn_reflns_limit_k_max        9
_diffrn_reflns_limit_k_min        -12
_diffrn_reflns_limit_l_max        30
_diffrn_reflns_limit_l_min        -31
_diffrn_reflns_number             10561
_diffrn_reflns_theta_full         25.34
_diffrn_reflns_theta_max          25.34
_diffrn_reflns_theta_min          3.01
_diffrn_ambient_temperature       293.15
_diffrn_detector_area_resol_mean  10.3592
_diffrn_measured_fraction_theta_full 0.998
_diffrn_measured_fraction_theta_max 0.998
_diffrn_measurement_device_type   'Xcalibur, Atlas, Gemini ultra'
_diffrn_measurement_method        '\w scans'
_diffrn_orient_matrix_UB_11       0.0107539000
_diffrn_orient_matrix_UB_12       0.0587274000
_diffrn_orient_matrix_UB_13       0.0125593000
_diffrn_orient_matrix_UB_21       0.0690926000
_diffrn_orient_matrix_UB_22       -0.0283329000
_diffrn_orient_matrix_UB_23       0.0186070000
_diffrn_orient_matrix_UB_31       0.0947675000
_diffrn_orient_matrix_UB_32       0.0140388000
_diffrn_orient_matrix_UB_33       -0.0149999000
_diffrn_radiation_monochromator   graphite
_diffrn_radiation_type            MoK\a
_diffrn_radiation_wavelength      0.71073
_diffrn_source                    'Enhance (Mo) X-ray Source'
_diffrn_standards_decay_%         ?
_diffrn_standards_interval_count  ?
_diffrn_standards_interval_time   ?
_diffrn_standards_number          ?
_reflns_number_gt                 2401
_reflns_number_total              3080
_reflns_odcompleteness_completeness 99.66
_reflns_odcompleteness_iscentric  1
_reflns_odcompleteness_theta      26.32
_reflns_threshold_expression      >2sigma(I)
_computing_cell_refinement
;
CrysAlisPro, Agilent Technologies,
Version 1.171.35.11 (release 16-05-2011 CrysAlis171 .NET)
(compiled May 16 2011,17:55:39)
;
_computing_data_collection
;
CrysAlisPro, Agilent Technologies,
Version 1.171.35.11 (release 16-05-2011 CrysAlis171 .NET)
(compiled May 16 2011,17:55:39)
;
_computing_data_reduction
;
CrysAlisPro, Agilent Technologies,
Version 1.171.35.11 (release 16-05-2011 CrysAlis171 .NET)
(compiled May 16 2011,17:55:39)
;
_computing_molecular_graphics     'Olex2 (Dolomanov et al., 2009)'
_computing_publication_material   'Olex2 (Dolomanov et al., 2009)'
_computing_structure_refinement   'ShelXL (Sheldrick, 2008)'
_computing_structure_solution     'ShelXS (Sheldrick, 2008)'
_refine_diff_density_max          0.369
_refine_diff_density_min          -0.322
_refine_diff_density_rms          0.045
_refine_ls_abs_structure_details  'Flack (1983), 1663 Friedel pairs'
_refine_ls_abs_structure_Flack    -0.004(11)
_refine_ls_extinction_coef        ?
_refine_ls_extinction_method      none
_refine_ls_goodness_of_fit_ref    1.035
_refine_ls_hydrogen_treatment     constr
_refine_ls_matrix_type            full
_refine_ls_number_parameters      202
_refine_ls_number_reflns          3080
_refine_ls_number_restraints      0
_refine_ls_R_factor_all           0.0574
_refine_ls_R_factor_gt            0.0376
_refine_ls_restrained_S_all       1.035
_refine_ls_shift/su_max           0.000
_refine_ls_shift/su_mean          0.000
_refine_ls_structure_factor_coef  Fsqd
_refine_ls_weighting_details
'calc w=1/[\s^2^(Fo^2^)+(0.0258P)^2^+0.3352P] where P=(Fo^2^+2Fc^2^)/3'
_refine_ls_weighting_scheme       calc
_refine_ls_wR_factor_gt           0.0683
_refine_ls_wR_factor_ref          0.0749
_refine_special_details
;
 Refinement of F^2^ against ALL reflections.  The weighted R-factor wR and 
 goodness of fit S are based on F^2^, conventional R-factors R are based 
 on F, with F set to zero for negative F^2^. The threshold expression of 
 F^2^ > 2sigma(F^2^) is used only for calculating R-factors(gt) etc. and is 
 not relevant to the choice of reflections for refinement.  R-factors based 
 on F^2^ are statistically about twice as large as those based on F, and R- 
 factors based on ALL data will be even larger. 
;
_olex2_refinement_description
;
1. Fixed Uiso
 At 1.2 times of:
  All C(H) groups, All C(H,H) groups
 At 1.5 times of:
  All C(H,H,H) groups
2.a Ternary CH refined with riding coordinates:
 C7(H7)
2.b Secondary CH2 refined with riding coordinates:
 C8(H8A,H8B), C13(H13A,H13B)
2.c Aromatic/amide H refined with riding coordinates:
 C1(H1), C2(H2), C4(H4), C5(H5), C15(H15), C16(H16), C17(H17), C18(H18),
 C19(H19)
2.d Idealised Me refined as rotating group:
 C11(H11A,H11B,H11C), C12(H12A,H12B,H12C)
;
_atom_sites_solution_hydrogens    geom
_atom_sites_solution_primary      direct
_atom_sites_solution_secondary    difmap
loop_
  _atom_site_label
  _atom_site_type_symbol
  _atom_site_fract_x
  _atom_site_fract_y
  _atom_site_fract_z
  _atom_site_U_iso_or_equiv
  _atom_site_adp_type
  _atom_site_occupancy
  _atom_site_calc_flag
  _atom_site_disorder_assembly
  _atom_site_disorder_group
  _atom_site_refinement_flags_posn
 Br1 Br 0.75310(8) 1.13473(4) 0.128650(14) 0.06783(15) Uani 1 d . . .
 O1 O -0.0628(4) 0.4242(2) 0.13003(9) 0.0556(6) Uani 1 d . . .
 N1 N 0.2406(4) 0.5516(2) 0.12488(7) 0.0350(5) Uani 1 d . . .
 C1 C 0.3731(5) 0.8210(3) 0.16008(12) 0.0429(9) Uani 1 d . . .
 H1 H 0.2321 0.8053 0.1730 0.051 Uiso 1 calc . . R
 C2 C 0.4403(5) 0.9441(4) 0.15403(12) 0.0463(9) Uani 1 d . . .
 H2 H 0.3469 1.0103 0.1628 0.056 Uiso 1 calc . . R
 C3 C 0.6485(5) 0.9665(4) 0.13479(11) 0.0447(9) Uani 1 d . . .
 C4 C 0.7854(5) 0.8694(4) 0.12109(11) 0.0499(9) Uani 1 d . . .
 H4 H 0.9251 0.8858 0.1075 0.060 Uiso 1 calc . . R
 C5 C 0.7149(5) 0.7471(3) 0.12754(11) 0.0423(8) Uani 1 d . . .
 H5 H 0.8083 0.6814 0.1182 0.051 Uiso 1 calc . . R
 C6 C 0.5079(5) 0.7200(3) 0.14764(10) 0.0352(8) Uani 1 d . . .
 C7 C 0.4367(5) 0.5861(3) 0.15520(10) 0.0367(8) Uani 1 d . . .
 H7 H 0.5600 0.5302 0.1461 0.044 Uiso 1 calc . . R
 C8 C 0.3574(5) 0.5542(4) 0.20913(11) 0.0458(9) Uani 1 d . . .
 H8A H 0.4804 0.5254 0.2299 0.055 Uiso 1 calc . . R
 H8B H 0.2918 0.6275 0.2252 0.055 Uiso 1 calc . . R
 C9 C 0.1854(5) 0.4505(3) 0.20284(11) 0.0420(9) Uani 1 d . . .
 C10 C 0.1033(5) 0.4719(3) 0.14873(11) 0.0375(8) Uani 1 d . . .
 C11 C -0.0060(6) 0.4590(5) 0.24013(14) 0.0789(14) Uani 1 d . . .
 H11A H -0.0719 0.5410 0.2381 0.118 Uiso 1 calc . . GR
 H11B H 0.0479 0.4449 0.2741 0.118 Uiso 1 calc . . GR
 H11C H -0.1151 0.3965 0.2319 0.118 Uiso 1 calc . . GR
 C12 C 0.2920(8) 0.3203(4) 0.20478(17) 0.0846(15) Uani 1 d . . .
 H12A H 0.1872 0.2586 0.1933 0.127 Uiso 1 calc . . GR
 H12B H 0.3354 0.3017 0.2391 0.127 Uiso 1 calc . . GR
 H12C H 0.4204 0.3189 0.1832 0.127 Uiso 1 calc . . GR
 C13 C 0.2275(6) 0.5786(3) 0.07060(10) 0.0441(8) Uani 1 d . . .
 H13A H 0.2213 0.6690 0.0659 0.053 Uiso 1 calc . . R
 H13B H 0.0905 0.5436 0.0574 0.053 Uiso 1 calc . . R
 C14 C 0.4181(5) 0.5276(3) 0.04008(10) 0.0362(8) Uani 1 d . . .
 C15 C 0.4791(6) 0.4033(4) 0.04344(12) 0.0533(10) Uani 1 d . . .
 H15 H 0.4008 0.3500 0.0650 0.064 Uiso 1 calc . . R
 C16 C 0.6534(6) 0.3563(4) 0.01555(13) 0.0650(11) Uani 1 d . . .
 H16 H 0.6929 0.2721 0.0188 0.078 Uiso 1 calc . . R
 C17 C 0.7693(7) 0.4323(3) -0.01694(11) 0.0522(9) Uani 1 d . . .
 H17 H 0.8849 0.4000 -0.0364 0.063 Uiso 1 calc . . R
 C18 C 0.7126(6) 0.5561(4) -0.02028(11) 0.0543(10) Uani 1 d . . .
 H18 H 0.7918 0.6087 -0.0419 0.065 Uiso 1 calc . . R
 C19 C 0.5386(6) 0.6046(4) 0.00814(11) 0.0515(9) Uani 1 d . . .
 H19 H 0.5029 0.6895 0.0056 0.062 Uiso 1 calc . . R

loop_
  _atom_site_aniso_label
  _atom_site_aniso_U_11
  _atom_site_aniso_U_22
  _atom_site_aniso_U_33
  _atom_site_aniso_U_23
  _atom_site_aniso_U_13
  _atom_site_aniso_U_12
 Br1 0.0727(2) 0.0473(2) 0.0835(3) 0.0104(2) -0.0049(3) -0.0129(3)
 O1 0.0475(13) 0.0570(18) 0.0622(14) 0.0022(13) -0.0134(12) -0.0164(13)
 N1 0.0327(12) 0.0401(14) 0.0322(11) 0.0010(11) -0.0043(14) -0.0005(16)
 C1 0.0321(16) 0.048(3) 0.0489(19) -0.0040(16) 0.0068(15) 0.0007(17)
 C2 0.044(2) 0.041(3) 0.0540(19) -0.0036(18) 0.0034(16) 0.0047(18)
 C3 0.0463(19) 0.045(2) 0.0429(18) 0.0041(17) -0.0064(15) -0.0085(17)
 C4 0.034(2) 0.056(3) 0.059(2) 0.0063(19) 0.0113(16) -0.005(2)
 C5 0.0286(17) 0.044(2) 0.0540(17) -0.0023(16) 0.0078(16) 0.0074(15)
 C6 0.0299(16) 0.044(2) 0.0323(16) -0.0057(14) -0.0005(12) 0.0015(16)
 C7 0.0297(15) 0.043(2) 0.0377(16) -0.0008(15) -0.0025(13) 0.0015(16)
 C8 0.0441(17) 0.054(3) 0.0397(18) 0.0049(17) -0.0057(14) -0.0034(19)
 C9 0.043(2) 0.040(2) 0.0433(17) 0.0072(16) -0.0024(13) -0.0039(16)
 C10 0.0318(17) 0.034(2) 0.0468(18) -0.0011(15) -0.0016(14) 0.0043(16)
 C11 0.059(2) 0.119(4) 0.058(2) 0.008(3) 0.0124(19) -0.025(3)
 C12 0.100(4) 0.048(3) 0.106(3) 0.018(2) -0.037(3) 0.002(3)
 C13 0.0503(19) 0.044(2) 0.0381(15) 0.0017(14) -0.0030(16) 0.000(2)
 C14 0.0452(19) 0.032(2) 0.0310(16) -0.0009(14) -0.0057(13) -0.0023(17)
 C15 0.075(2) 0.037(3) 0.047(2) 0.0038(17) 0.0165(18) -0.005(2)
 C16 0.094(3) 0.037(2) 0.064(2) 0.000(2) 0.022(2) 0.012(2)
 C17 0.062(2) 0.051(2) 0.0439(17) -0.0020(16) 0.0116(19) 0.004(2)
 C18 0.063(2) 0.057(3) 0.0433(17) 0.0084(16) 0.0136(17) -0.008(2)
 C19 0.072(2) 0.037(2) 0.0455(19) 0.0120(16) 0.0077(17) 0.005(2)

_geom_special_details
;
 All esds (except the esd in the dihedral angle between two l.s. planes) 
 are estimated using the full covariance matrix.  The cell esds are taken 
 into account individually in the estimation of esds in distances, angles 
 and torsion angles; correlations between esds in cell parameters are only 
 used when they are defined by crystal symmetry.  An approximate (isotropic) 
 treatment of cell esds is used for estimating esds involving l.s. planes. 
;
loop_
  _geom_bond_atom_site_label_1
  _geom_bond_atom_site_label_2
  _geom_bond_distance
  _geom_bond_site_symmetry_2
  _geom_bond_publ_flag
 Br1 C3 1.904(4) . ?
 O1 C10 1.225(3) . ?
 N1 C7 1.471(4) . ?
 N1 C10 1.340(4) . ?
 N1 C13 1.456(3) . ?
 C1 H1 0.9300 . ?
 C1 C2 1.380(5) . ?
 C1 C6 1.385(4) . ?
 C2 H2 0.9300 . ?
 C2 C3 1.372(4) . ?
 C3 C4 1.370(5) . ?
 C4 H4 0.9300 . ?
 C4 C5 1.378(5) . ?
 C5 H5 0.9300 . ?
 C5 C6 1.384(4) . ?
 C6 C7 1.501(5) . ?
 C7 H7 0.9800 . ?
 C7 C8 1.533(4) . ?
 C8 H8A 0.9700 . ?
 C8 H8B 0.9700 . ?
 C8 C9 1.523(4) . ?
 C9 C10 1.522(4) . ?
 C9 C11 1.515(4) . ?
 C9 C12 1.527(5) . ?
 C11 H11A 0.9600 . ?
 C11 H11B 0.9600 . ?
 C11 H11C 0.9600 . ?
 C12 H12A 0.9600 . ?
 C12 H12B 0.9600 . ?
 C12 H12C 0.9600 . ?
 C13 H13A 0.9700 . ?
 C13 H13B 0.9700 . ?
 C13 C14 1.502(4) . ?
 C14 C15 1.374(5) . ?
 C14 C19 1.379(4) . ?
 C15 H15 0.9300 . ?
 C15 C16 1.375(5) . ?
 C16 H16 0.9300 . ?
 C16 C17 1.367(5) . ?
 C17 H17 0.9300 . ?
 C17 C18 1.363(5) . ?
 C18 H18 0.9300 . ?
 C18 C19 1.387(5) . ?
 C19 H19 0.9300 . ?

loop_
  _geom_angle_atom_site_label_1
  _geom_angle_atom_site_label_2
  _geom_angle_atom_site_label_3
  _geom_angle
  _geom_angle_site_symmetry_1
  _geom_angle_site_symmetry_3
  _geom_angle_publ_flag
 C10 N1 C7 113.6(2) . . ?
 C10 N1 C13 123.3(2) . . ?
 C13 N1 C7 121.6(2) . . ?
 C2 C1 H1 118.8 . . ?
 C2 C1 C6 122.5(3) . . ?
 C6 C1 H1 118.8 . . ?
 C1 C2 H2 120.8 . . ?
 C3 C2 C1 118.4(3) . . ?
 C3 C2 H2 120.8 . . ?
 C2 C3 Br1 119.8(3) . . ?
 C4 C3 Br1 119.1(2) . . ?
 C4 C3 C2 121.1(3) . . ?
 C3 C4 H4 120.2 . . ?
 C3 C4 C5 119.5(3) . . ?
 C5 C4 H4 120.2 . . ?
 C4 C5 H5 119.3 . . ?
 C4 C5 C6 121.4(3) . . ?
 C6 C5 H5 119.3 . . ?
 C1 C6 C7 122.5(3) . . ?
 C5 C6 C1 117.2(3) . . ?
 C5 C6 C7 120.3(3) . . ?
 N1 C7 C6 113.2(2) . . ?
 N1 C7 H7 109.1 . . ?
 N1 C7 C8 101.2(2) . . ?
 C6 C7 H7 109.1 . . ?
 C6 C7 C8 114.9(3) . . ?
 C8 C7 H7 109.1 . . ?
 C7 C8 H8A 110.6 . . ?
 C7 C8 H8B 110.6 . . ?
 H8A C8 H8B 108.7 . . ?
 C9 C8 C7 105.8(2) . . ?
 C9 C8 H8A 110.6 . . ?
 C9 C8 H8B 110.6 . . ?
 C8 C9 C12 111.5(3) . . ?
 C10 C9 C8 102.4(3) . . ?
 C10 C9 C12 107.7(3) . . ?
 C11 C9 C8 113.8(3) . . ?
 C11 C9 C10 110.3(3) . . ?
 C11 C9 C12 110.7(3) . . ?
 O1 C10 N1 125.4(3) . . ?
 O1 C10 C9 125.3(3) . . ?
 N1 C10 C9 109.3(3) . . ?
 C9 C11 H11A 109.5 . . ?
 C9 C11 H11B 109.5 . . ?
 C9 C11 H11C 109.5 . . ?
 H11A C11 H11B 109.5 . . ?
 H11A C11 H11C 109.5 . . ?
 H11B C11 H11C 109.5 . . ?
 C9 C12 H12A 109.5 . . ?
 C9 C12 H12B 109.5 . . ?
 C9 C12 H12C 109.5 . . ?
 H12A C12 H12B 109.5 . . ?
 H12A C12 H12C 109.5 . . ?
 H12B C12 H12C 109.5 . . ?
 N1 C13 H13A 108.7 . . ?
 N1 C13 H13B 108.7 . . ?
 N1 C13 C14 114.2(3) . . ?
 H13A C13 H13B 107.6 . . ?
 C14 C13 H13A 108.7 . . ?
 C14 C13 H13B 108.7 . . ?
 C15 C14 C13 121.2(3) . . ?
 C15 C14 C19 118.0(3) . . ?
 C19 C14 C13 120.8(3) . . ?
 C14 C15 H15 119.3 . . ?
 C14 C15 C16 121.3(3) . . ?
 C16 C15 H15 119.3 . . ?
 C15 C16 H16 119.8 . . ?
 C17 C16 C15 120.5(4) . . ?
 C17 C16 H16 119.8 . . ?
 C16 C17 H17 120.5 . . ?
 C18 C17 C16 118.9(3) . . ?
 C18 C17 H17 120.5 . . ?
 C17 C18 H18 119.5 . . ?
 C17 C18 C19 121.0(3) . . ?
 C19 C18 H18 119.5 . . ?
 C14 C19 C18 120.2(4) . . ?
 C14 C19 H19 119.9 . . ?
 C18 C19 H19 119.9 . . ?

loop_
  _geom_torsion_atom_site_label_1
  _geom_torsion_atom_site_label_2
  _geom_torsion_atom_site_label_3
  _geom_torsion_atom_site_label_4
  _geom_torsion
  _geom_torsion_site_symmetry_1
  _geom_torsion_site_symmetry_2
  _geom_torsion_site_symmetry_3
  _geom_torsion_site_symmetry_4
  _geom_torsion_publ_flag
 Br1 C3 C4 C5 177.1(2) . . . . ?
 N1 C7 C8 C9 27.3(3) . . . . ?
 N1 C13 C14 C15 52.1(4) . . . . ?
 N1 C13 C14 C19 -127.3(3) . . . . ?
 C1 C2 C3 Br1 -177.2(2) . . . . ?
 C1 C2 C3 C4 1.0(5) . . . . ?
 C1 C6 C7 N1 62.2(4) . . . . ?
 C1 C6 C7 C8 -53.5(4) . . . . ?
 C2 C1 C6 C5 -1.3(5) . . . . ?
 C2 C1 C6 C7 178.7(3) . . . . ?
 C2 C3 C4 C5 -1.2(5) . . . . ?
 C3 C4 C5 C6 0.0(4) . . . . ?
 C4 C5 C6 C1 1.2(4) . . . . ?
 C4 C5 C6 C7 -178.8(3) . . . . ?
 C5 C6 C7 N1 -117.8(3) . . . . ?
 C5 C6 C7 C8 126.6(3) . . . . ?
 C6 C1 C2 C3 0.2(5) . . . . ?
 C6 C7 C8 C9 149.7(3) . . . . ?
 C7 N1 C10 O1 -175.3(3) . . . . ?
 C7 N1 C10 C9 5.0(4) . . . . ?
 C7 N1 C13 C14 54.6(4) . . . . ?
 C7 C8 C9 C10 -24.9(3) . . . . ?
 C7 C8 C9 C11 -143.9(3) . . . . ?
 C7 C8 C9 C12 90.0(3) . . . . ?
 C8 C9 C10 O1 -166.8(3) . . . . ?
 C8 C9 C10 N1 12.9(3) . . . . ?
 C10 N1 C7 C6 -143.9(3) . . . . ?
 C10 N1 C7 C8 -20.4(3) . . . . ?
 C10 N1 C13 C14 -110.6(3) . . . . ?
 C11 C9 C10 O1 -45.4(5) . . . . ?
 C11 C9 C10 N1 134.4(3) . . . . ?
 C12 C9 C10 O1 75.5(4) . . . . ?
 C12 C9 C10 N1 -104.7(3) . . . . ?
 C13 N1 C7 C6 49.6(4) . . . . ?
 C13 N1 C7 C8 173.1(3) . . . . ?
 C13 N1 C10 O1 -9.0(5) . . . . ?
 C13 N1 C10 C9 171.2(3) . . . . ?
 C13 C14 C15 C16 180.0(3) . . . . ?
 C13 C14 C19 C18 -179.3(3) . . . . ?
 C14 C15 C16 C17 -0.9(6) . . . . ?
 C15 C14 C19 C18 1.3(5) . . . . ?
 C15 C16 C17 C18 1.6(6) . . . . ?
 C16 C17 C18 C19 -0.9(5) . . . . ?
 C17 C18 C19 C14 -0.6(5) . . . . ?
 C19 C14 C15 C16 -0.6(5) . . . . ?
